# Supplementary material
Source: publisher figshare collection journal article supplement (https://gsajournals.figshare.com/ndownloader/files/26826986)
Supplement: Supplementary file 1 [file 26826986]

## Sheet: dlb_1
Supplemental Table 3 - NGS reads and read counts for dlb_1
WT reference sequence:
WT: TTCTGAGGACGTGATCTCCGCAGAGCCTCCGTGCACCTTCGGAACCGGTCAGACCAGCGTCCTGCGAGCGGACCAGAGCTCCATAGCCAGCAGCGCTGCCATCCGGGTGCCTTTTCACTTCAAG
Sequence	Read Count	Read %
INJECTED #1
TTCTGAGGACGTGATCTCCGCAGAGCCTCCGTGCACCTTCGGAACCGGTCAGACCAGCGTCCTGCGAGCGGACCAGAGCTCCATAGCCAGCAGCGCTGCCATCCGGGTGCCTTTTCACTTCAAG , WT	83	11.2314
TTCTGAGGACGTGATCTCCGCAGAGCCTCCGTGCACCTTCGGAACCGGTCAGACCAGCGGACCAGAGCTCCATAGCCAGCAGCGCTGCCATCCGGGTGCCTTTTCACTTCAAG , 178	178	24.0866
TTCTGAGGACGTGATCTCCGCAGAGCCTCCGTGCACCTTCGGAACCGGTCAGACCAGCGTCCTGCGAGCGGACCAGAGCTCCATAGCCAGCAGCGCTGCCATCCGGGTGCCTTTTCACTTCAAG , 126	126	17.0501
TTCTGAGGACGTGATCTCCGCAGAGCCTCCGTGCACCTTCGGAACCGGTCAGACCAGCGTCGGACCAGAGCTCCATAGCCAGCAGCGCTGCCATCCGGGTGCCTTTTCACTTCAAG , 68	68	9.20162
TTCTGAGGACGTGATCTCCGCAGAGCCTCCGTGCACCTTCGGAACCGGTCAGACCAGCGTCCTGCGGACCAGAGCTCCATAGCCAGCAGCGCTGCCATCCGGGTGCCTTTTCACTTCAAG , 63	63	8.52503
TTCTGAGGACGTGATCTCCGCAGAGCCTCCGTGCACCTTCGGAACCGGTCAGACCAGCGTCCATAGCCAGCAGCGCTGCCATCCGGGTGCCTTTTCACTTCAAGTGGCCGGTAAAG , 41	41	5.54804
TTCTGAGGACGTGATCTCCGCAGAGCCTCCGTGCACCTTCGGAACCGGTCAGACCAGCGTCCAGCGTCGAGCGGACCAGAGCTCCATAGCCAGCAGCGCTGCCATCCGGGTGCCTTTTCACTTCAAG , 35	35	4.73613
TTCTGAGGACGTGATCTCCGCAGAGCCTCCGTGCACCTTCGGAACCGGTCAGACCAGCGTCCTGCCGAGCGGACCAGAGCTCCATAGCCAGCAGCGCTGCCATCCGGGTGCCTTTTCACTTCAAG , 31	31	4.19486
TTCTGAGGACGTGATCTCCGCAGAGCCTCCGTGCACCTTCGGAACCGGTCAGACCAGAGCTCCATAGCCAGCAGCGCTGCCATCCGGGTGCCTTTTCACTTCAAG , 31	31	4.19486
TTCTGAGGACGTGATCTCCGCAGAGCCTCCGTGCACCTTCGGAACCGGTCAGACCGGTCGGACCAGAGCTCCATAGCCAGCAGCGCTGCCATCCGGGTGCCTTTTCACTTCAAG , 29	29	3.92422
TTCTGAGGACGTGATCTCCGCAGAGCCTCCGTGCACCTTCGGAACCGGTCAGACCAGCGTCCTGAGCTCCATAGCCAGCAGCGCTGCCATCCGGGTGCCTTTTCACTTCAAG , 22	22	2.977
TTCTGAGGACGTGATCTCCGCAGAGCCTCCGTGCACCTTCGGAACCGGTCAGACCAGCGTCCTGAGCGGACCAGAGCTCCATAGCCAGCAGCGCTGCCATCCGGGTGCCTTTTCACTTCAAG , 16	16	2.16509
TTCTGAGGACGTGATCTCCGCAGAGCCTCCGTGCACCTTCGGAACCGGTCAGCGGACCAGAGCTCCATAGCCAGCAGCGCTGCCATCCGGGTGCCTTTTCACTTCAAG , 16	16	2.16509
INJECTED #2
TTCTGAGGACGTGATCTCCGCAGAGCCTCCGTGCACCTTCGGAACCGGTCAGACCAGCGTCCTGCGAGCGGACCAGAGCTCCATAGCCAGCAGCGCTGCCATCCGGGTGCCTTTTCACTTCAAG , WT	0	0
TTCTGAGGACGTGATCTCCGCAGAGCCTCCGTGCACCTTCGGAACCGGTCAGACCAGAGCTCCATAGCCAGCAGCGCTGCCATCCGGGTGCCTTTTCACTTCAAG , 8	8	19.5122
TTCTGAGGACGTGATCTCCGCAGAGCCTCCGTGCACCTTCGGAACCGGTCAGACCAGCGGACCAGAGCTCCATAGCCAGCAGCGCTGCCATCCGGGTGCCTTTTCACTTCAAG , 6	6	14.6341
TTCTGAGGACGTGATCTCCGCAGAGCCTCCGTGCACCTTCGGAACCGGTCAGACCAGCGACCAGAGCTCCATAGCCAGCAGCGCTGCCATCCGGGTGCCTTTTCACTTCAAG , 4	4	9.7561
TTCTGAGGACGTGATCTCCGCAGAGCCTCCGTGCACCTTCGGAACCGGTCAGACCAGCGTCCTGAGCTCCATAGCCAGCAGCGCTGCCATCCGGGTGCCTTTTCACTTCAAG , 3	3	7.31707
TTCTGAGGACGTGATCTCCGCAGAGCCTCCGTGCACCTTCGGAACCGGTCAGACCGGTCAGACCAGCGAGCGGACCAGAGCTCCATAGCCAGCAGCGCTGCCATCCGGGTGCCTTTTCACTTCAAG , 3	3	7.31707
TTCTGAGGACGTGATCTCCGCAGAGCCTCCGTGCACCTTCGGAACCGGTCAGACCAGCGTCCTGGAGCGGACCAGAGCTCCATAGCCAGCAGCGCTGCCATCCGGGTGCCTTTTCACTTCAAG , 3	3	7.31707
TTCTGAGGACGTGATCTCCGCAGAGCCTCCGTGCACCTTCGGAACCGGTCAGACCAGCGTCCTGACCAGAGCTCCATAGCCAGCAGCGCTGCCATCCGGGTGCCTTTTCACTTCAAG , 3	3	7.31707
TTCTGAGGACGTGATCTCCGCAGAGCCTCCGTGCACCTTCGGAACCGGTCGGACCAGAGCTCCATAGCCAGCAGCGCTGCCATCCGGGTGCCTTTTCACTTCAAG , 3	3	7.31707
TTCTGAGGACGTGATCTCCGCAGAGCCTCCGTGCACCTTCGGAACCAGAGCTCCATAGCCAGCAGCGCTGCCATCCGGGTGCCTTTTCACTTCAAG , 3	3	7.31707
TTCTGAGGACGTGATCTCCGCAGAGCCTCCGTGCACCTTCGGAACCGGTCAGACCAGCGTCCGCTATGGAGCGGACCAGAGCTCCATAGCCAGCAGCGCTGCCATCCGGGTGCCTTTTCACTTCAAG , 2	2	4.87805
TTCTGAGGACGTGATCTCCGCAGAGCCTCCGTGCACCTTCGGAACCGGTCAGAGCGGACCAGAGCTCCATAGCCAGCAGCGCTGCCATCCGGGTGCCTTTTCACTTCAAG , 2	2	4.87805
TTCTGAGGACGTGATCTCCGCAGAGCCTCCGTGCACCTTCGGAACCGAAGGACCAGAGCTCCATAGCCAGCAGCGCTGCCATCCGGGTGCCTTTTCACTTCAAG , 1	1	2.43902
INJECTED #3
TTCTGAGGACGTGATCTCCGCAGAGCCTCCGTGCACCTTCGGAACCGGTCAGACCAGCGTCCTGCGAGCGGACCAGAGCTCCATAGCCAGCAGCGCTGCCATCCGGGTGCCTTTTCACTTCAAG , WT	0	0
TTCTGAGGACGTGATCTCCGCAGAGCCTCCGTGCACCTTCGGAACCGGTCAGACCAGCGGACCAGAGCTCCATAGCCAGCAGCGCTGCCATCCGGGTGCCTTTTCACTTCAAG , 20	20	33.3333
TCTCCGCAGAGCCCCCGTGCACCTTCGGAACCGGTCAGACCAGCGGACCAGAGCTCCATAGCCAGCAGCGCTGCCATCCGGGTGCCTTTTCACTTCAAG , 15	15	25
TTCTGAGGACGTGATCTCCGCAGAGCCTCCGTGCACCTTCGGAACCGGTCAGACCAGCGTCCTGCGGACCAGAGCTCCATAGCCAGCAGCGCTGCCATCCGGGTGCCTTTTCACTTCAAG , 6	6	10
TTCTGAGGACGTGATCTCCGCAGAGCCTCCGTGCACCTTCGGAACCGGTCAGACCAGCGTCCGAGCGGACCAGAGCTCCATAGCCAGCAGCGCTGCCATCCGGGTGCCTTTTCACTTCAAG , 3	3	5
TTCTGAGGACGTGATCTCCGCAGAGCCTCCGTGCACCTTCGGAACCGGTCAGACCAGCGTCTGACCAGGACCAGAGCTCCATAGCCAGCAGCGCTGCCATCCGGGTGCCTTTTCACTTCAAG , 2	2	3.33333
TTCTGAGGACGTGATCTCCGCAGAGCCTCCGTGCGGACCAGAGCTCCATAGCCAGCAGCGCTGCCATCCGGGTGCCTTTTCACTTCAAG , 2	2	3.33333
TTCTGAGGACGTGATCTCCGCAGAGCCCCCGTGCACCTTCGGAACCGGTCAGACCAGCGTCCTGAGCGGACCAGAGCTCCATAGCCAGCAGCGCTGCCATCCGGGTGCCTTTTCACTTCAAG , 2	2	3.33333
TTCTGAGGACGTGATCTCCGCAGAGCCCCCGTGCAGAGCTCCATAGCCAGCAGCGCTGCCATCCGGGTGCCTTTTCACTTCAAG , 2	2	3.33333
TTCTGAGGACGTGATCTCCGCAGAGCCTCCGTGCACCTTCGGAACCGGTCAGACCAGCGTCCAGCGACGAGCGACGAGCGACCAGACGAGCGACCAGCGACGAGCGGACCAGAGCTCCATAGCCAGCAGCGCTGCCATCCGGGTGCCTTTTCACTTCAAG , 2	2	3.33333
TTCTGAGGACGTGATCTCCGCAGAGCCTCCGTGCACCTTCGGAACCGGTCAGACCAGCGCTCCATAGCCAGCAGCGCTGCCATCCGGGTGCCTTTTCACTTCAAG , 2	2	3.33333
TTCTGAGGACGTGATCTCCGCAGAGCCTCCGTGCACCTTCGGAACCGGTCAGACCAGCGTCCAGAGCTCCATAGCCAGCAGCGCTGCCATCCGGGTGCCTTTTCACTTCAAG , 2	2	3.33333
TTCTGAGGACGTGATCTCCGCAGAGCCTCCGTGCACCTTCGGAACCGAGCGGACCAGAGCTCCATAGCCAGCAGCGCTGCCATCCGGGTGCCTTTTCACTTCAAG , 2	2	3.33333
INJECTED #4
TTCTGAGGACGTGATCTCCGCAGAGCCTCCGTGCACCTTCGGAACCGGTCAGACCAGCGTCCTGCGAGCGGACCAGAGCTCCATAGCCAGCAGCGCTGCCATCCGGGTGCCTTTTCACTTCAAG	5	1.45349
TTCTGAGGACGTGATCTCCGCAGAGCCTCCGTGCACCTTCGGAACCGGTCAGACCAGCGTCCAGCGTCCTGCCGAGCGGACCAGAGCTCCATAGCCAGCAGCGCTGCCATCCGGGTGCCTTTTCACTTCAAG , 93	93	27.0349
TTCTGAGGACGTGATCTCCGCAGAGCCTCCGTGCACCTTCGGAACCGGTCAGACCAGCGGACCAGAGCTCCATAGCCAGCAGCGCTGCCATCCGGGTGCCTTTTCACTTCAAG , 73	73	21.2209
TTCTGAGGACGTGATCTCCGCAGAGCCTCCGTGCACCTTCGGAACCGGTCAGACCAGAGCTCCATAGCCAGCAGCGCTGCCATCCGGGTGCCTTTTCACTTCAAG , 36	36	10.4651
TTCTGAGGACGTGATCTCCGCAGAGCCTCCGTGCACCTTCGGAACCGGTCAGACCAGCGTCTGAGACGGACCAGAGCTCCATAGCCAGCAGCGCTGCCATCCGGGTGCCTTTTCACTTCAAG , 24	24	6.97674
TTCTGAGGACGTGATCTCCGCAGAGCCTCCGTGCACCTTCGGAACCGGTCAGACCAGCGTCCTGCGGACCAGAGCTCCATAGCCAGCAGCGCTGCCATCCGGGTGCCTTTTCACTTCAAG , 24	24	6.97674
TTCTGAGGACGTGATCTCCGCAGAGCCTCCGTGCACCTTCGGAACCGGTCGGACCAGAGCTCCATAGCCAGCAGCGCTGCCATCCGGGTGCCTTTTCACTTCAAG , 17	17	4.94186
TTCTGAGGACGTGATCTCCGCAGAGCCTCCGTGCACCTTCGGAACCGGTCAGACCAGCGTCCTGAGCGGACCAGAGCTCCATAGCCAGCAGCGCTGCCATCCGGGTGCCTTTTCACTTCAAG , 15	15	4.36047
TTCTGAGGACGTGATCTCCGCAGAGCCTCCGTGCACCTTCGGAACCGGACCAGAGCTCCATAGCCAGCAGCGCTGCCATCCGGGTGCCTTTTCACTTCAAG , 14	14	4.06977
TTCTGAGGACGTGATCTCCGCAGAGCCTCCGTGCACCTTCGGAACCGGTCAGACCAGCGTCCTGCCGAGCGGACCAGAGCTCCATAGCCAGCAGCGCTGCCATCCGGGTGCCTTTTCACTTCAAG , 12	12	3.48837
TTCTGAGGACGTGATCTCCGCAGAGCCTCCGTGCACCTTCGGAACCGGTCAGACCAGCGTCAGACCGGTCAGCGGACCAGAGCTCCATAGCCAGCAGCGCTGCCATCCGGGTGCCTTTTCACTTCAAG , 11	11	3.19767
TTCTGAGGACGTGATCTCCGCAGAGCCTCCGTGCACCTTCGGAACCGGCCATCCGGGTGCCTTTTCACTTCAAG , 10	10	2.90698
TTCTGAGGACGTGATCTCCGCAGAGCCTCCGTGCACCTTCGGAACCGGTCAGACCAGCGTC-CTGGAGCGGACCAGAGCTCCATAGCCAGCAGCGCTGCCATCCGGGTGCCTTTTCACTTCAAG , 10	10	2.90698
INJECTED #5
TTCTGAGGACGTGATCTCCGCAGAGCCTCCGTGCACCTTCGGAACCGGTCAGACCAGCGTCCTGCGAGCGGACCAGAGCTCCATAGCCAGCAGCGCTGCCATCCGGGTGCCTTTTCACTTCAAG , WT	3	0.499168
TTCTGAGGACGTGATCTCCGCAGAGCCTCCGTGCACCTTCGGAACCGGTCAGACCAGCGTCCAGAGCTCCATAGCCAGCAGCGCTGCCATCCGGGTGCCTTTTCACTTCAAG , 210	210	34.9418
TTCTGAGGACGTGATCTCCGCAGAGCCTCCGTGCACCTTCGGAACCGGTCAGACCAGCGGACCAGAGCTCCATAGCCAGCAGCGCTGCCATCCGGGTGCCTTTTCACTTCAAG , 86	86	14.3095
TTCTGAGGACGTGATCTCCGCAGAGCCTCCGTGCACCTTCGGAACCGGTCAGACCAGCGTCCTGCTCCATAGCCAGCAGCGCTGCCATCCGGGTGCCTTTTCACTTCAAG , 76	76	12.6456
TTCTGAGGACGTGATCTCCGCAGAGCCTCCGTGCACCTTCGGAACCGGTCAGACCAGAGCTCCATAGCCAGCAGCGCTGCCATCCGGGTGCCTTTTCACTTCAAG , 75	75	12.4792
TTCTGAGGACGTGATCTCCGCAGAGCCTCCGTGCACCTTCGGAACCGGTCAGACCAGCGTCCACTGGACCAGAGCTCCATAGCCAGCAGCGCTGCCATCCGGGTGCCTTTTCACTTCAAG , 46	46	7.65391
TTCTGAGGACGTGATCTCCGCAGAGCCTCCGTGCACCTTCGGAACCGGTCAGACCAGCGTCTGACCAGAGCTCCATAGCCAGCAGCGCTGCCATCCGGGTGCCTTTTCACTTCAAG , 21	21	3.49418
TTCTGAGGACGTGATCTCCGCAGAGCCTCCGTGCACCTTCGGAACCGGTCAGACCAGCGTCCTGCCGAGCGGACCAGAGCTCCATAGCCAGCAGCGCTGCCATCCGGGTGCCTTTTCACTTCAAG , 20	20	3.32779
TTCTGAGGACGTGATCTCCGCAGAGCCTCCGTGCACCTTCGGAACCGGTCAGACCAGCGTCCTGCGGACCAGAGCTCCATAGCCAGCAGCGCTGCCATCCGGGTGCCTTTTCACTTCAAG , 16	16	2.66223
TTCTGAGGACGTGATCTCCGCAGAGCCTCCGTGCACCTTCGGAACCGGTCAGACCAGCGTCCTGAGCGGACCAGAGCTCCATAGCCAGCAGCGCTGCCATCCGGGTGCCTTTTCACTTCAAG , 14	14	2.32945
TTCTGAGGACGTGATCTCCGCAGAGCCTCCGTGCACCTTCGGAACCGGTCAGACCAGCGTCCATAGCCAGCAGCGCTGCCATCCGGGTGCCTTTTCACTTCAAG , 14	14	2.32945
TTCTGAGGACGTGATCTCCGCAGAGCCTCCGTGCACCTTCGGAACCGGTCAGACCAGCGTCCTGGACCAGAGCTCCATAGCCAGCAGCGCTGCCATCCGGGTGCCTTTTCACTTCAAG , 10	10	1.66389
TTCTGAGGACGTGATCTCCGCAGAGCCTCCGTGCACCTTCGGAACCGGTCAGACCAGCGTCCTGAGCCAGCAGCGCTGCCATCCGGGTGCCTTTTCACTTCAAG , 10	10	1.66389
INJECTED #6
TTCTGAGGACGTGATCTCCGCAGAGCCTCCGTGCACCTTCGGAACCGGTCAGACCAGCGTCCTGCGAGCGGACCAGAGCTCCATAGCCAGCAGCGCTGCCATCCGGGTGCCTTTTCACTTCAAG ,WT	0	0
TTCTGAGGACGTGATCTCCGCAGAGCCTCCGTGCACCTTCGGAACCGGTCAGACCAGCGTCTGGTCAGACCAGAGCTCCATAGCCAGCAGCGCTGCCATCCGGGTGCCTTTTCACTTCAAG , 52	52	47.2727
TTCTGAGGACGTGATCTCCGCAGAGCCTCCGTGCACCTTCGGAACCGGTCAGACCAGCGTCCTGACCAGCGGACCAGCGGACCAGAGCTCCATAGCCAGCAGCGCTGCCATCCGGGTGCCTTTTCACTTCAAG , 22	22	20
TTCTGAGGACGTGATCTCCGCAGAGCCCCCGTGCACCTTCGGAACCGGTCAGACCAGCGTCCTGGGCCGGACCAGAGCGGACCAGAGCTCCATAGCCAGCAGCGCTGCCATCCGGGTGCCTTTTCACTTCAAG , 13	13	11.8182
TTCTGAGGACGTGATCTCCGCAGAGCCTCCGTGCACCTTCGGAACCGGTCAGACCAGCGTCCTGGACCAGAGCTCCATAGCCAGCAGCGCTGCCATCCGGGTGCCTTTTCACTTCAAG , 4	4	3.63636
TCTCCGCAGAGCCCCCGTGCACCTTCGGAACCGGTCAGACCAGCGGACCAGAGCTCCATAGCCAGCAGCGCTGCCATCCGGGTGCCTTTTCACTTCAAG , 4	4	3.63636
TTCTGAGGACGTGATCTCCGCAGAGCCCCCGTGCACCTTCGGAACCGGCGGACCAGAGCTCCATAGCCAGCAGCGCTGCCATCCGGGTGCCTTTTCACTTCAAG , 3	3	2.72727
TTCTGAGGACGTGATCTCCGCAGAGCCCCCGTGCACCTTCGGAACCGGTCAGACCAGCGTCCTGACCAGAGCTCCATAGCCAGCAGCGCTGCCATCCGGGTGCCTTTTCACTTCAAG , 2	2	1.81818
TTCTGAGGACGTGATCTCCGCAGAGCCCCCGTGCACCTTCGGAACCGGTCAGACCAGCGTCCTGAGCGGACCAGAGCTCCATAGCCAGCAGCGCTGCCATCCGGGTGCCTTTTCACTTCAAG , 2	2	1.81818
TTCTGAGGACGTGATCTCCGCAGAGCCCCCGTGCACCTTCGGAACCGGTCAGACCAGAGCTCCATAGCCAGCAGCGCTGCCATCCGGGTGCCTTTTCACTTCAAG , 2	2	1.81818
TTCTGAGGACGTGATCTCCGCAGAGCCCCCGTGCACCTTCGGAACCGGTCAGACCAGCGTCCTGACCAGCGGACCAGCGGACCAGAGCTCCATAGCCAGCAGCGCTGCCATCCGGGTGCCTTTTCACTTCAAG , 2	2	1.81818
TTCTGAGGACGTGATCTCCGCAGAGCCCCCGTGCACCTTCGGAACCGGTCAGACCAGCGTCCAGAGCTCCATAGCCAGCAGCGCTGCCATCCGGGTGCCTTTTCACTTCAAG , 2	2	1.81818
TTCTGAGGACGTGATCTCCGCAGAGCCTCCGTGCACCTTCGGAACCGGTCAGACCAGCGGACCAGAGCTCCATAGCCAGCAGCGCTGCCATCCGGGTGCCTTTTCACTTCAAG , 2	2	1.81818
INJECTED #7
TTCTGAGGACGTGATCTCCGCAGAGCCTCCGTGCACCTTCGGAACCGGTCAGACCAGCGTCCTGCGAGCGGACCAGAGCTCCATAGCCAGCAGCGCTGCCATCCGGGTGCCTTTTCACTTCAAG , WT	0	0
TTCTGAGGACGTGATCTCCGCAGAGCCTCCGTGCACCTTCGGTCCGGAGCGGACCAGAGCTCCATAGCCAGCAGCGCTGCCATCCGGGTGCCTTTTCACTTCAAG , 10	10	16.6667
TTCTGAGGACGTGATCTCCGCAGAGCCTCCGTGCACCTTCGGAACCGGTCAGACCAGCGGACCAGAGCTCCATAGCCAGCAGCGCTGCCATCCGGGTGCCTTTTCACTTCAAG , 10	10	16.6667
TTCTGAGGACGTGATCTCCGCAGAGCCTCCGTGCACCTTCGGAACCGGTCAGACCAGCGTCCTGCGGACCAGAGCTCCATAGCCAGCAGCGCTGCCATCCGGGTGCCTTTTCACTTCAAG , 10	10	16.6667
TTCTGAGGACGTGATCTCCGCAGAGCCTCCGTGCACCTTCGGAACCGGTCAGACCAGCGTCCTGAGCTCCACAGCGGACCAGAGCTCCATAGCCAGCAGCGCTGCCATCCGGGTGCCTTTTCACTTCAAG , 6	6	10
TTCTGAGGACGTGATCTCCGCAGAGCCCCCGTGCACCTTCGGAACCGGTCAGACCAGCGGACCAGAGCTCCATAGCCAGCAGCGCTGCCATCCGGGTGCCTTTTCACTTCAAG , 6	6	10
TTCTGAGGACGTGATCTCCGCAGAGCCTCCGTGCACCTTCGGAACCGGTCAGACCAGCGTCCTAATAGCGGACCAGAGCTCCATAGCCAGCAGCGCTGCCATCCGGGTGCCTTTTCACTTCAAG , 5	5	8.33333
TTCTGAGGACGTGATCTCCGCAGAGCCTCCGTGCACCTTCGGAACCGGTCAGACCAGAGCTCCATAGCCAGCAGCGCTGCCATCCGGGTGCCTTTTCACTTCAAG , 3	3	5
TCTCCGCAGAGCCTCCGTGCACCTTCGGAACCGGTCAGACCAGCGTCCTGCCAGACCAGCGGACCAGAGCTCCATAGCCAGCAGCGCTGCCATCCGGGTGCCTTTTCACTTCAAG , 2	2	3.33333
TTCTGAGGACGTGATCTCCGCAGAGCCCCCGTGCACCTTCGGAACCGGTCAGACCAGCGTCCTATGGAGCGGACCAGAGCTCCATAGCCAGCAGCGCTGCCATCCGGGTGCCTTTTCACTTCAAG , 2	2	3.33333
TTCTGAGGACGTGATCTCCGCAGAGCCCCCGTGCACCTTCGGAACCGGTCAGACCAGCGTCTCAAGCGTCCTTTTTTCGGATTTGTCTCGAGCGGACCAGAGCTCCATAGCCAGCAGCGCTGCCATCCGGGTGCCTTTTCACTTCAAG , 2	2	3.33333
TTCTGAGGACGTGATCTCCGCAGAGCCTCCGTGCACCTTCGGAACCGGTCAGACCAGCGGTGCCTTTTCACTTCAAG , 2	2	3.33333
TTCTGAGGACGTGATCTCCGCAGAGCCCCCGTGCACCTTCGGAACCGGTCAGACCAGCGTCCTGCCGAGCGGACCAGAGCTCCATAGCCAGCAGCGCTGCCATCCGGGTGCCTTTTCACTTCAAG , 2	2	3.33333
INJECTED #8
TTCTGAGGACGTGATCTCCGCAGAGCCTCCGTGCACCTTCGGAACCGGTCAGACCAGCGTCCTGCGAGCGGACCAGAGCTCCATAGCCAGCAGCGCTGCCATCCGGGTGCCTTTTCACTTCAAG , WT	88	9.41176
TTCGGAACCGGTCAGACCAGCGTCCTGAACGGACCAGAGCTCCATAGCCAGCAGCGCTGCCATCCGGGTGCCTTTTCACTTCAAG , 340	340	36.3636
TTCGGAACCGGTCAGACCAGCGGACCAGAGCTCCATAGCCAGCAGCGCTGCCATCCGGGTGCCTTTTCACTTCAAGTGGCCGGTAAAG , 149	149	15.9358
TTCGGAACCGGTCAGACCAGCGTCCTGCGAGCGGACCAGAGCTCCATAGCCAGCAGCGCTGCCATCCGGGTGCCTTTTCACTTCAAG , 86	86	9.19786
TTCTGAGGACGTGATCTCCGCAGAGCCTCCGTGCACCTTCGGAACCGGTCAGACCAGCGTCCTGAGCGGACCAGAGCTCCATAGCCAGCAGCGCTGCCATCCGGGTGCCTTTTCACTTCAAGTGGCCGGTAAAG , 63	63	6.73797
TTCTGAGGACGTGATCTCCGCAGAGCCTCCGTGCACCTTCGGAACCGGTCAGACCAGCGTCCTGCGGACCAGAGCTCCATAGCCAGCAGCGCTGCCATCCGGGTGCCTTTTCACTTCAAG , 50	50	5.34759
TTCTGAGGACGTGATCTCCGCAGAGCCTCCGTGCACCTTCGGAACCGGTCAGACCAGAGCTCCATAGCCAGCAGCGCTGCCATCCGGGTGCCTTTTCACTTCAAG , 50	50	5.34759
TTCTGAGGACGTGATCTCCGCAGAGCCTCCGTGCACCTTCGGAACCGGTCAGACCAGCGCTCCATAGCCAGCAGCGCTGCCATCCGGGTGCCTTTTCACTTCAAG , 36	36	3.85027
TTCTGAGGACGTGATCTCCGCAGAGCCTCCGTGCACCTTCGGAACCGGTCAGACCAGCGTCCTGAGCTCCATAGCCAGCAGCGCTGCCATCCGGGTGCCTTTTCACTTCAAG , 21	21	2.24599
TTCTGAGGACGTGATCTCCGCAGAGCCTCCGTGCACCTTCGGAACCGGTCAGACCAGCGTCCAGAGCTCCATAGCCAGCAGCGCTGCCATCCGGGTGCCTTTTCACTTCAAG , 20	20	2.13904
TTCTGAGGACGTGATCTCCGCAGAGCCTCCGTGCACCTTCGGAACCGGTCGGACCAGAGCTCCATAGCCAGCAGCGCTGCCATCCGGGTGCCTTTTCACTTCAAG , 14	14	1.49733
TTCTGAGGACGTGATCTCCGCAGAGCCTCCGTGCACCTTCGGAACCGGTCAGACCAGCGTCCTGCCGAGCGGACCAGAGCTCCATAGCCAGCAGCGCTGCCATCCGGGTGCCTTTTCACTTCAAG , 10	10	1.06952
TTCTGAGGACGTGATCTCCGCAGAGCCTCCGTGCACCTTCGGAACCGGTCAGACCAGCGACCAGCGGACCAGAGCTCCATAGCCAGCAGCGCTGCCATCCGGGTGCCTTTTCACTTCAAG , 8	8	0.855615
